# Supplementary material for: Doing Experimental Psychological Research from Remote: How Alerting Differently Impacts Online vs. Lab Setting
Source: MDPI journal article supplement (doi:10.3390/brainsci12081061), 2022-08-10
Supplement: s1 [file s1]

## SUPPLEMENTARY MATERIAL

### Doing Experimental Psychological Research from Remote: How Alerting Differently Impacts

#### Online vs. Lab Setting

Fiorella Del Popolo Cristaldi, Umberto Granziol, Irene Bariletti, Giovanni Mento

**Table S1.** Fixed and random effects resulting from the Linear Mixed-effects Model (LMM) on the log-transformed reaction times (log-RT): estimates (in logit scale), standard error (*SE*), 95% confidence interval (*CI*), statistics (*t*-value), *p*-values (*p*) and degrees of freedom (*df*) are reported. Bold *p*-values signal statistical significance. The marginal and conditional  $R^2$  are also reported. SOA = Stimulus Onset Asynchrony

| <i>Predictors</i>                            | log-RT           |           |               |                  |                  |           |
|----------------------------------------------|------------------|-----------|---------------|------------------|------------------|-----------|
|                                              | <i>Estimates</i> | <i>SE</i> | <i>CI</i>     | <i>Statistic</i> | <i>p</i>         | <i>df</i> |
| (Intercept)                                  | 5.45             | 0.04      | 5.37 – 5.52   | 144.62           | <b>&lt;0.001</b> | 2271.00   |
| SOA [medium]                                 | 0.05             | 0.01      | 0.03 – 0.06   | 6.03             | <b>&lt;0.001</b> | 2271.00   |
| SOA [short]                                  | 0.18             | 0.01      | 0.16 – 0.20   | 22.31            | <b>&lt;0.001</b> | 2271.00   |
| block [fast]                                 | -0.01            | 0.01      | -0.02 – 0.01  | -0.86            | 0.388            | 2271.00   |
| block [uniform]                              | -0.01            | 0.01      | -0.03 – 0.00  | -1.79            | 0.074            | 2271.00   |
| group [lab]                                  | -0.07            | 0.03      | -0.12 – -0.01 | -2.29            | <b>0.022</b>     | 2271.00   |
| gender [M]                                   | -0.05            | 0.03      | -0.11 – 0.01  | -1.79            | 0.074            | 2271.00   |
| age years                                    | 0.01             | 0.00      | 0.01 – 0.01   | 10.55            | <b>&lt;0.001</b> | 2271.00   |
| SOA [medium] * block [fast]                  | -0.03            | 0.01      | -0.05 – -0.00 | -2.33            | <b>0.020</b>     | 2271.00   |
| SOA [short] * block [fast]                   | -0.08            | 0.01      | -0.10 – -0.05 | -6.57            | <b>&lt;0.001</b> | 2271.00   |
| SOA [medium] * block [uniform]               | -0.01            | 0.01      | -0.03 – 0.01  | -0.96            | 0.338            | 2271.00   |
| SOA [short] * block [uniform]                | -0.01            | 0.01      | -0.03 – 0.01  | -0.83            | 0.409            | 2271.00   |
| SOA [medium] * group [lab]                   | 0.02             | 0.02      | -0.01 – 0.05  | 1.11             | 0.269            | 2271.00   |
| SOA [short] * group [lab]                    | 0.01             | 0.02      | -0.02 – 0.04  | 0.45             | 0.655            | 2271.00   |
| block [fast] * group [lab]                   | 0.01             | 0.02      | -0.02 – 0.04  | 0.74             | 0.458            | 2271.00   |
| block [uniform] * group [lab]                | -0.01            | 0.02      | -0.04 – 0.03  | -0.31            | 0.758            | 2271.00   |
| SOA [medium] * block [fast] * group [lab]    | -0.01            | 0.02      | -0.06 – 0.03  | -0.61            | 0.540            | 2271.00   |
| SOA [short] * block [fast] * group [lab]     | 0.02             | 0.02      | -0.02 – 0.07  | 1.04             | 0.299            | 2271.00   |
| SOA [medium] * block [uniform] * group [lab] | -0.03            | 0.02      | -0.07 – 0.02  | -1.25            | 0.210            | 2271.00   |
| SOA [short] * block [uniform] * group [lab]  | -0.00            | 0.02      | -0.05 – 0.04  | -0.10            | 0.923            | 2271.00   |

#### Random Effects

|                                    |               |
|------------------------------------|---------------|
| $\sigma^2$                         | 0.01          |
| $\tau_{00\ n}$                     | 0.04          |
| ICC                                | 0.84          |
| $N_n$                              | 255           |
| Observations                       | 2293          |
| Marginal $R^2$ / Conditional $R^2$ | 0.332 / 0.893 |

**Table S2.** Fixed and random effects resulting from the Generalized Linear Mixed-effects Model (GLMM) on accuracy: estimates (in odds ratios), standard error (*SE*), 95% confidence interval (*CI*), statistics (z-test), *p*-values (*p*) and degrees of freedom (*df*) are reported. Bold *p*-values signal statistical significance. The marginal and conditional  $R^2$  are also reported. SOA = Stimulus Onset Asynchrony

| <i>Predictors</i>                            | accuracy           |           |               |                  |              |
|----------------------------------------------|--------------------|-----------|---------------|------------------|--------------|
|                                              | <i>Odds Ratios</i> | <i>SE</i> | <i>CI</i>     | <i>Statistic</i> | <i>p</i>     |
| (Intercept)                                  | 58.93              | 13.06     | 38.18 – 90.98 | 18.40            | <0.001       |
| SOA [medium]                                 | 1.48               | 0.16      | 1.19 – 1.84   | 3.51             | <0.001       |
| SOA [short]                                  | 7.35               | 4.00      | 2.53 – 21.37  | 3.66             | <0.001       |
| block [fast]                                 | 0.70               | 0.11      | 0.51 – 0.97   | -2.16            | <b>0.031</b> |
| block [uniform]                              | 0.78               | 0.07      | 0.65 – 0.94   | -2.63            | <b>0.008</b> |
| group [lab]                                  | 1.19               | 0.22      | 0.82 – 1.71   | 0.92             | 0.359        |
| gender [M]                                   | 0.65               | 0.11      | 0.46 – 0.91   | -2.48            | <b>0.013</b> |
| age years                                    | 1.00               | 0.00      | 0.99 – 1.01   | 0.78             | 0.434        |
| SOA [medium] * block [fast]                  | 1.00               | 0.20      | 0.67 – 1.49   | -0.02            | 0.988        |
| SOA [short] * block [fast]                   | 0.44               | 0.25      | 0.14 – 1.34   | -1.45            | 0.147        |
| SOA [medium] * block [uniform]               | 1.30               | 0.21      | 0.94 – 1.78   | 1.60             | 0.110        |
| SOA [short] * block [uniform]                | 0.45               | 0.25      | 0.15 – 1.34   | -1.44            | 0.151        |
| SOA [medium] * group [lab]                   | 0.54               | 0.12      | 0.35 – 0.83   | -2.81            | <b>0.005</b> |
| SOA [short] * group [lab]                    | 0.11               | 0.12      | 0.01 – 0.92   | -2.03            | <b>0.042</b> |
| block [fast] * group [lab]                   | 0.52               | 0.17      | 0.28 – 0.98   | -2.01            | <b>0.044</b> |
| block [uniform] * group [lab]                | 1.04               | 0.19      | 0.73 – 1.50   | 0.23             | 0.819        |
| SOA [medium] * block [fast] * group [lab]    | 2.90               | 1.18      | 1.31 – 6.46   | 2.61             | <b>0.009</b> |
| SOA [short] * block [fast] * group [lab]     | 11.97              | 13.69     | 1.27 – 112.58 | 2.17             | <b>0.030</b> |
| SOA [medium] * block [uniform] * group [lab] | 1.52               | 0.49      | 0.80 – 2.87   | 1.28             | 0.199        |
| SOA [short] * block [uniform] * group [lab]  | 4.38               | 4.93      | 0.48 – 39.75  | 1.31             | 0.190        |

# Random Effects

|                                    |               |
|------------------------------------|---------------|
| $\sigma^2$                         | 3.29          |
| $\tau_{00\ n}$                     | 1.09          |
| ICC                                | 0.01          |
| $N\ n$                             | 255           |
| Observations                       | 68850         |
| Marginal $R^2$ / Conditional $R^2$ | 0.163 / 0.173 |

**Table S3.** Results from the Linear Model (LM) on Delta scores: estimates (in msec), standard error (SE), 95% confidence interval (CI), statistics (*t*-test), *p*-values (*p*) and degrees of freedom (*df*) are reported. Bold *p*-values signal statistical significance. The  $R^2$  and the adjusted  $R^2$  are also reported.

| <i>Predictors</i>      | Delta            |           |                |                  |                  |           |
|------------------------|------------------|-----------|----------------|------------------|------------------|-----------|
|                        | <i>Estimates</i> | <i>SE</i> | <i>CI</i>      | <i>Statistic</i> | <i>p</i>         | <i>df</i> |
| (Intercept)            | -3.96            | 12.73     | -29.03 – 21.11 | -0.31            | 0.756            | 251.00    |
| group [lab]            | -1.33            | 9.07      | -19.20 – 16.54 | -0.15            | 0.884            | 251.00    |
| gender [M]             | -11.10           | 10.46     | -31.71 – 9.50  | -1.06            | 0.290            | 251.00    |
| age years              | 0.96             | 0.27      | 0.43 – 1.50    | 3.55             | <b>&lt;0.001</b> | 251.00    |
| Observations           | 255              |           |                |                  |                  |           |
| $R^2$ / $R^2$ adjusted | 0.048 / 0.037    |           |                |                  |                  |           |
